# Supplementary material for: Exploring the influence of electron donating/withdrawing groups on hexamolybdate-based derivatives for efficient p-type dye-sensitized solar cells (DSSCs)
Source: Royal Society of Chemistry journal article supplement (doi:10.1039/c5ra05164a), 2015-01-01
Supplement: c5ra05164a1.pdf [file c5ra05164a1.pdf]

## Supplementary Information

### Exploring the Influence of Electron Donating/ Withdrawing Groups on Hexamolybdate-Based Derivatives for Efficient *p*-Type Dye-Sensitized Solar Cells (DSSCs)

Lin Lin Sun, Ting Zhang, Jing Wang, Hong Li, Li Kai Yan\* and Zhong Min Su\*

Cartesian coordinate of final optimized geometries of systems 1-5

System 1: E=-2483.54730080 a.u.

|    |             |             |             |
|----|-------------|-------------|-------------|
| Mo | -0.38521700 | 0.70716300  | 0.00000000  |
| Mo | 0.00235700  | -1.54657900 | 2.34617200  |
| Mo | 2.35355900  | -1.16214600 | 0.00000000  |
| Mo | -2.34222200 | -1.95716000 | 0.00000000  |
| Mo | 0.00235700  | -1.54657900 | -2.34617200 |
| Mo | 0.41037700  | -3.91044300 | 0.00000000  |
| O  | 0.00127100  | -1.49838900 | 0.00000000  |
| O  | 0.01195200  | -1.58810500 | 4.05779400  |
| O  | 4.06203700  | -1.05780900 | 0.00000000  |
| O  | -4.04662700 | -2.11426600 | 0.00000000  |
| O  | 0.01195200  | -1.58810500 | -4.05779400 |
| O  | 0.54612300  | -5.61469300 | 0.00000000  |
| O  | -2.13808500 | 0.11335900  | 0.00000000  |
| O  | -0.14547500 | 0.31938200  | 1.91963100  |
| O  | 1.73990300  | 0.56042400  | 0.00000000  |
| O  | -0.14547500 | 0.31938200  | -1.91963100 |
| O  | 0.16257000  | -3.43427800 | 1.85154300  |
| O  | -1.87609700 | -1.72374100 | 1.87273600  |
| O  | 1.88947500  | -1.41032500 | 1.86471200  |
| O  | 2.12086100  | -3.26296000 | 0.00000000  |
| O  | 1.88947500  | -1.41032500 | -1.86471200 |

|   |             |             |             |
|---|-------------|-------------|-------------|
| O | -1.67964900 | -3.66608800 | 0.00000000  |
| O | -1.87609700 | -1.72374100 | -1.87273600 |
| O | 0.16257000  | -3.43427800 | -1.85154300 |
| N | -0.57161100 | 2.46109000  | 0.00000000  |
| C | -0.71926100 | 3.81720600  | 0.00000000  |
| C | -2.00618600 | 4.37237100  | 0.00000000  |
| C | -2.11814000 | 5.77487500  | 0.00000000  |
| H | -3.11546100 | 6.19952000  | 0.00000000  |
| C | -1.02763700 | 6.63402000  | 0.00000000  |
| C | 1.48915100  | 6.87736500  | 0.00000000  |
| H | 1.39194900  | 7.95445200  | 0.00000000  |
| C | 2.74764700  | 6.30248900  | 0.00000000  |
| C | 2.87237100  | 4.89496700  | 0.00000000  |
| H | 3.86719400  | 4.46027700  | 0.00000000  |
| C | 1.75191200  | 4.09260600  | 0.00000000  |
| H | 1.85771400  | 3.01285100  | 0.00000000  |
| C | 0.45364100  | 4.66080000  | 0.00000000  |
| C | 0.30771300  | 6.08825700  | 0.00000000  |
| C | -3.25542700 | 3.52712200  | 0.00000000  |
| H | -3.03261700 | 2.45900500  | 0.00000000  |
| H | -3.86921900 | 3.74917000  | -0.88195200 |
| H | -3.86921900 | 3.74917000  | 0.88195200  |
| C | -1.29320800 | 8.09703500  | 0.00000000  |
| O | -0.46601800 | 8.99634700  | 0.00000000  |
| O | -2.61977500 | 8.39284400  | 0.00000000  |
| H | -2.67328600 | 9.36690400  | 0.00000000  |
| N | 3.96205300  | 7.08986400  | 0.00000000  |
| H | 3.96222200  | 7.71078100  | -0.80954300 |
| H | 3.96222200  | 7.71078100  | 0.80954300  |

System 2:  $E = -2542.72608523$  a.u

|    |             |             |             |
|----|-------------|-------------|-------------|
| Mo | -0.54439800 | -0.54499200 | -0.00004500 |
| Mo | 1.67080300  | 0.02423800  | 2.34639000  |
| Mo | 1.09793900  | 2.33807500  | 0.00015600  |
| Mo | 2.26832700  | -2.27937000 | -0.00013600 |
| Mo | 1.67083800  | 0.02454400  | -2.34637100 |
| Mo | 3.99494200  | 0.62211500  | 0.00006700  |
| O  | 1.61777900  | 0.01832900  | 0.00000900  |
| O  | 1.71267100  | 0.03764300  | 4.05768500  |
| O  | 0.85631200  | 4.03296000  | 0.00026600  |
| O  | 2.56349900  | -3.96562300 | -0.00024700 |
| O  | 1.71273300  | 0.03817200  | -4.05766300 |
| O  | 5.68283500  | 0.89478300  | 0.00009200  |
| O  | 0.18403900  | -2.24578200 | -0.00015200 |
| O  | -0.17543500 | -0.27668800 | 1.92072000  |
| O  | -0.56851600 | 1.58657300  | 0.00008700  |
| O  | -0.17541000 | -0.27643800 | -1.92076900 |
| O  | 3.53945500  | 0.33701000  | 1.85116600  |
| O  | 2.00083700  | -1.83362300 | 1.87263500  |
| O  | 1.38250000  | 1.89386500  | 1.86529600  |
| O  | 3.20784500  | 2.27382800  | 0.00017000  |
| O  | 1.38253500  | 1.89410900  | -1.86503700 |
| O  | 3.91812500  | -1.47909200 | -0.00006600 |
| O  | 2.00087000  | -1.83337900 | -1.87285300 |
| O  | 3.53948000  | 0.33724700  | -1.85107600 |
| N  | -2.28475500 | -0.83653200 | -0.00006400 |
| C  | -3.63791200 | -1.01672200 | -0.00005400 |
| C  | -4.15952400 | -2.32031600 | -0.00003700 |
| C  | -5.55608100 | -2.46487000 | -0.00002100 |
| H  | -5.95919500 | -3.47113400 | -0.00000700 |
| C  | -6.44352000 | -1.39371100 | -0.00002800 |
| C  | -6.76094900 | 1.10977700  | -0.00005000 |
| H  | -7.83001000 | 0.96909500  | -0.00003500 |

|   |             |             |             |
|---|-------------|-------------|-------------|
| C | -6.20468200 | 2.37612100  | -0.00007200 |
| C | -4.79709800 | 2.54584900  | -0.00008300 |
| H | -4.39268000 | 3.55343900  | -0.00009800 |
| C | -3.97432200 | 1.44796000  | -0.00007100 |
| H | -2.89830000 | 1.58373600  | -0.00007100 |
| C | -4.50925700 | 0.13095300  | -0.00005600 |
| C | -5.93246500 | -0.04573100 | -0.00004600 |
| C | -3.27985700 | -3.54621200 | -0.00003000 |
| H | -2.21862500 | -3.29167000 | -0.00004000 |
| H | -3.48242300 | -4.16633600 | -0.88218000 |
| H | -3.48240900 | -4.16631900 | 0.88213500  |
| C | -7.89752000 | -1.69418700 | -0.00001100 |
| O | -8.81760100 | -0.88876500 | 0.00007900  |
| O | -8.16410600 | -3.02756400 | 0.00014300  |
| H | -9.13682400 | -3.10134500 | 0.00022800  |
| O | -6.92109600 | 3.53403100  | -0.00008900 |
| C | -8.34220000 | 3.44600500  | -0.00019100 |
| H | -8.70939700 | 2.92756100  | -0.89420700 |
| H | -8.70954500 | 2.92763700  | 0.89380700  |
| H | -8.70480100 | 4.47517100  | -0.00026500 |

System 3:  $E = -2585.45706744$  a.u.

|    |             |             |             |
|----|-------------|-------------|-------------|
| Mo | -0.24825100 | 0.62177500  | -0.20248400 |
| Mo | 2.04508300  | -0.28947700 | -2.37169200 |
| Mo | 1.17511400  | -2.33456800 | 0.17688300  |
| Mo | 2.61404800  | 2.20043100  | -0.16242300 |
| Mo | 1.73418300  | 0.15406200  | 2.38749800  |
| Mo | 4.12377600  | -0.77183500 | 0.21584800  |
| O  | 1.84645900  | -0.05218000 | 0.00311900  |
| O  | 2.17203100  | -0.26582700 | -4.08019300 |
| O  | 0.73878500  | -3.99003400 | 0.12859400  |
| O  | 3.10990900  | 3.83880200  | -0.10648300 |

|   |             |             |             |
|---|-------------|-------------|-------------|
| O | 1.67206700  | 0.11193000  | 4.09938400  |
| O | 5.76424600  | -1.24862000 | 0.28510000  |
| O | 0.66445400  | 2.31088400  | -0.02873600 |
| O | 0.22467800  | 0.46103400  | -2.03721300 |
| O | -0.42832400 | -1.38806700 | -0.12096600 |
| O | -0.01951400 | 0.43759300  | 1.83420800  |
| O | 3.80394600  | -0.56944300 | -1.76345700 |
| O | 2.51871000  | 1.75001800  | -1.92701200 |
| O | 1.44814000  | -1.94969200 | -1.91393700 |
| O | 3.14987800  | -2.39855100 | 0.04246300  |
| O | 1.29373800  | -1.88423700 | 1.94241200  |
| O | 4.21116200  | 1.20100800  | 0.13755200  |
| O | 2.35913900  | 1.80501200  | 1.93044000  |
| O | 3.57568000  | -0.60070500 | 1.99786300  |
| N | -1.95044600 | 1.09087000  | -0.24544800 |
| C | -3.27144600 | 1.41247400  | -0.16784100 |
| C | -3.64426200 | 2.76370600  | -0.12674700 |
| C | -5.01423500 | 3.06406700  | -0.04330500 |
| H | -5.30062800 | 4.10852800  | -0.00918200 |
| C | -6.01296700 | 2.09644800  | -0.00188000 |
| C | -6.59112500 | -0.36626200 | -0.00641400 |
| H | -7.63638100 | -0.10284200 | 0.05957500  |
| C | -6.21291000 | -1.70087000 | -0.04833300 |
| C | -4.82910400 | -1.99752300 | -0.13142000 |
| H | -4.49109200 | -3.02682100 | -0.16523400 |
| C | -3.88216900 | -0.99624900 | -0.16934100 |
| H | -2.82890700 | -1.25144900 | -0.22647000 |
| C | -4.26202000 | 0.36578300  | -0.12922100 |
| C | -5.65415000 | 0.69997900  | -0.04571300 |
| C | -2.60889200 | 3.85666300  | -0.16831600 |
| H | -2.00212100 | 3.79630200  | -1.07960200 |
| H | -1.91161500 | 3.77836900  | 0.67391400  |

|   |             |             |             |
|---|-------------|-------------|-------------|
| H | -3.08256000 | 4.84195400  | -0.13373800 |
| C | -7.42348400 | 2.55693700  | 0.08756400  |
| O | -8.42791100 | 1.86062800  | 0.09939100  |
| O | -7.53447200 | 3.90999100  | 0.16065300  |
| H | -8.49124700 | 4.09367400  | 0.21060900  |
| C | -7.29080600 | -2.80161700 | 0.00513700  |
| C | -8.28084900 | -2.61550500 | -1.16947500 |
| C | -6.69006400 | -4.21740300 | -0.09473900 |
| C | -8.06053200 | -2.69681200 | 1.34384800  |
| H | -8.78054400 | -1.64216000 | -1.13074300 |
| H | -7.76450600 | -2.69087700 | -2.13355200 |
| H | -9.05539800 | -3.39171700 | -1.13731200 |
| H | -6.01012500 | -4.43432300 | 0.73686500  |
| H | -7.49581300 | -4.95967800 | -0.06392400 |
| H | -6.14115300 | -4.36318900 | -1.03210800 |
| H | -8.83653900 | -3.47062500 | 1.39759400  |
| H | -7.38447300 | -2.83410600 | 2.19578700  |
| H | -8.54807900 | -1.72266100 | 1.45495900  |

System 4:  $E = -2616.77466126$  a.u.

|    |             |             |             |
|----|-------------|-------------|-------------|
| Mo | -0.59051100 | 0.44821300  | 0.00000000  |
| Mo | 0.03613000  | -1.75356900 | 2.34592800  |
| Mo | 2.33379200  | -1.11791400 | 0.00000000  |
| Mo | -2.25352200 | -2.40767200 | 0.00000000  |
| Mo | 0.03613000  | -1.75356900 | -2.34592800 |
| Mo | 0.69135000  | -4.06114000 | 0.00000000  |
| O  | 0.02810800  | -1.69794500 | 0.00000000  |
| O  | 0.04849000  | -1.79109000 | 4.05699700  |
| O  | 4.02274100  | -0.84022500 | 0.00000000  |
| O  | -3.93286100 | -2.73890700 | 0.00000000  |
| O  | 0.04849000  | -1.79109000 | -4.05699700 |
| O  | 1.00180800  | -5.74217100 | 0.00000000  |

|   |             |             |             |
|---|-------------|-------------|-------------|
| O | -2.27129300 | -0.32152900 | 0.00000000  |
| O | -0.31071000 | 0.08686000  | 1.91612800  |
| O | 1.54489600  | 0.52995000  | 0.00000000  |
| O | -0.31071000 | 0.08686000  | -1.91612800 |
| O | 0.39379700  | -3.61172200 | 1.85183100  |
| O | -1.81319800 | -2.12629800 | 1.87185500  |
| O | 1.89634200  | -1.41625800 | 1.86460700  |
| O | 2.32199200  | -3.23557300 | 0.00000000  |
| O | 1.89634200  | -1.41625800 | -1.86460700 |
| O | -1.41426600 | -4.03693600 | 0.00000000  |
| O | -1.81319800 | -2.12629800 | -1.87185500 |
| O | 0.39379700  | -3.61172200 | -1.85183100 |
| N | -0.93925500 | 2.17955800  | 0.00000000  |
| C | -1.18893500 | 3.51982300  | 0.00000000  |
| C | -2.51285200 | 3.97871400  | 0.00000000  |
| C | -2.73317100 | 5.36993100  | 0.00000000  |
| H | -3.75993400 | 5.71718900  | 0.00000000  |
| C | -1.71246400 | 6.30849800  | 0.00000000  |
| C | 0.77334300  | 6.74153600  | 0.00000000  |
| H | 0.59556100  | 7.80593000  | 0.00000000  |
| C | 2.06903100  | 6.25297200  | 0.00000000  |
| C | 2.31073600  | 4.85821600  | 0.00000000  |
| H | 3.33477400  | 4.50095500  | 0.00000000  |
| C | 1.25418600  | 3.97890300  | 0.00000000  |
| H | 1.43640200  | 2.90972100  | 0.00000000  |
| C | -0.08423000 | 4.45160600  | 0.00000000  |
| C | -0.34130100 | 5.86239800  | 0.00000000  |
| C | -3.69354900 | 3.04128100  | 0.00000000  |
| H | -3.38987100 | 1.99325900  | 0.00000000  |
| H | -4.32179600 | 3.21744900  | -0.88200700 |
| H | -4.32179600 | 3.21744900  | 0.88200700  |
| C | -2.08448200 | 7.75009000  | 0.00000000  |

|   |             |            |            |
|---|-------------|------------|------------|
| O | -1.32266100 | 8.70428200 | 0.00000000 |
| O | -3.42768300 | 7.94553000 | 0.00000000 |
| H | -3.55665800 | 8.91267400 | 0.00000000 |
| C | 3.24389100  | 7.16349400 | 0.00000000 |
| O | 4.40522400  | 6.79358500 | 0.00000000 |
| O | 2.91021900  | 8.47551000 | 0.00000000 |
| H | 3.75000800  | 8.97257100 | 0.00000000 |

System 5:  $E = -2632.70348366$  a.u.

|    |             |             |             |
|----|-------------|-------------|-------------|
| Mo | -0.59051100 | 0.44821300  | 0.00000000  |
| Mo | 0.03613000  | -1.75356900 | 2.34592800  |
| Mo | 2.33379200  | -1.11791400 | 0.00000000  |
| Mo | -2.25352200 | -2.40767200 | 0.00000000  |
| Mo | 0.03613000  | -1.75356900 | -2.34592800 |
| Mo | 0.69135000  | -4.06114000 | 0.00000000  |
| O  | 0.02810800  | -1.69794500 | 0.00000000  |
| O  | 0.04849000  | -1.79109000 | 4.05699700  |
| O  | 4.02274100  | -0.84022500 | 0.00000000  |
| O  | -3.93286100 | -2.73890700 | 0.00000000  |
| O  | 0.04849000  | -1.79109000 | -4.05699700 |
| O  | 1.00180800  | -5.74217100 | 0.00000000  |
| O  | -2.27129300 | -0.32152900 | 0.00000000  |
| O  | -0.31071000 | 0.08686000  | 1.91612800  |
| O  | 1.54489600  | 0.52995000  | 0.00000000  |
| O  | -0.31071000 | 0.08686000  | -1.91612800 |
| O  | 0.39379700  | -3.61172200 | 1.85183100  |
| O  | -1.81319800 | -2.12629800 | 1.87185500  |
| O  | 1.89634200  | -1.41625800 | 1.86460700  |
| O  | 2.32199200  | -3.23557300 | 0.00000000  |
| O  | 1.89634200  | -1.41625800 | -1.86460700 |
| O  | -1.41426600 | -4.03693600 | 0.00000000  |
| O  | -1.81319800 | -2.12629800 | -1.87185500 |



|   |             |             |             |
|---|-------------|-------------|-------------|
| O | 0.39379700  | -3.61172200 | -1.85183100 |
| N | -0.93925500 | 2.17955800  | 0.00000000  |
| C | -1.18893500 | 3.51982300  | 0.00000000  |
| C | -2.51285200 | 3.97871400  | 0.00000000  |
| C | -2.73317100 | 5.36993100  | 0.00000000  |
| H | -3.75993400 | 5.71718900  | 0.00000000  |
| C | -1.71246400 | 6.30849800  | 0.00000000  |
| C | 0.77334300  | 6.74153600  | 0.00000000  |
| H | 0.59556100  | 7.80593000  | 0.00000000  |
| C | 2.06903100  | 6.25297200  | 0.00000000  |
| C | 2.31073600  | 4.85821600  | 0.00000000  |
| H | 3.33477400  | 4.50095500  | 0.00000000  |
| C | 1.25418600  | 3.97890300  | 0.00000000  |
| H | 1.43640200  | 2.90972100  | 0.00000000  |
| C | -0.08423000 | 4.45160600  | 0.00000000  |
| C | -0.34130100 | 5.86239800  | 0.00000000  |
| C | -3.69354900 | 3.04128100  | 0.00000000  |
| H | -3.38987100 | 1.99325900  | 0.00000000  |
| H | -4.32179600 | 3.21744900  | -0.88200700 |
| H | -4.32179600 | 3.21744900  | 0.88200700  |
| C | -2.08448200 | 7.75009000  | 0.00000000  |
| O | -1.32266100 | 8.70428200  | 0.00000000  |
| O | -3.42768300 | 7.94553000  | 0.00000000  |
| H | -3.55665800 | 8.91267400  | 0.00000000  |
| C | 3.24389100  | 7.16349400  | 0.00000000  |
| O | 4.40522400  | 6.79358500  | 0.00000000  |
| O | 2.91021900  | 8.47551000  | 0.00000000  |
| H | 3.75000800  | 8.97257100  | 0.00000000  |

As system **4** has two carboxy groups at 1- and 7-positions, the system **4**-(NiO)<sub>4</sub> and **4'**-(NiO)<sub>4</sub> ((NiO)<sub>4</sub> connected with carboxy groups at 1- and 7-position, respectively.) were optimized at the level of B3LYP/6-31G\* for nonmetal atoms (LANL2DZ for Mo and Ni). After BSSE correction, the  $E_{\text{bind}}$  decreases in the order: **4**-(NiO)<sub>4</sub> (-88.14eV) > **4'**-(NiO)<sub>4</sub> (-84.14eV). Therefore, the system **4**-(NiO)<sub>4</sub> is more stable than system **4'**-(NiO)<sub>4</sub>.

Moreover, the FMOs of systems **4**-(NiO)<sub>4</sub> and **4'**-(NiO)<sub>4</sub> were studied and the results were shown in Fig. S1. For these two systems, the distributions of  $\alpha$ -LUMO,  $\beta$ -HOMO and  $\beta$ -LUMO are similar to those of isolated dyes. In addition, the  $\alpha$ -HOMO in system **4**-(NiO)<sub>4</sub> localizes over the organic groups and (NiO)<sub>4</sub> cluster. The  $\alpha$ -HOMO in system **4'**-(NiO)<sub>4</sub> localizes over -COOH at 7-position and (NiO)<sub>4</sub> cluster. The distribution of occupied molecular orbitals and unoccupied molecular orbitals for system **4**-(NiO)<sub>4</sub> are in a straight line. And it may contribute to the intramolecular charge transfer. So, we selected system **4**-(NiO)<sub>4</sub> as a theoretical model system to study.

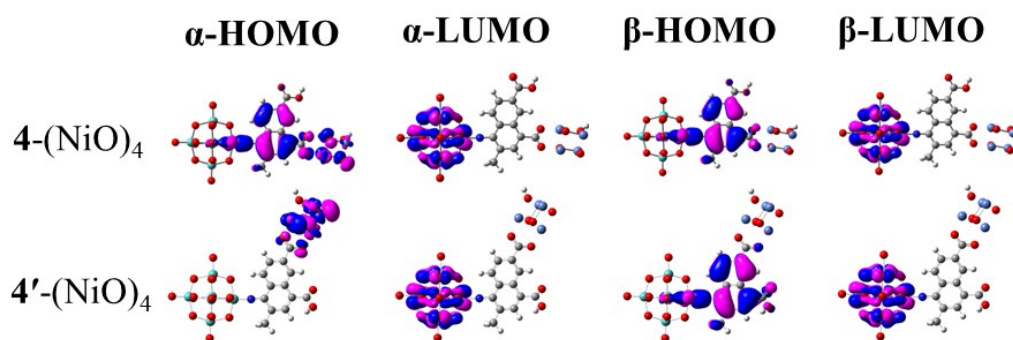

**Fig. S1** Isosurfaces of selected frontier orbitals of systems **4**-(NiO)<sub>4</sub> and **4'**-(NiO)<sub>4</sub>.
